# Supplementary material
Source: PubMed Central journal article supplement (PMC3832279)
Supplement: 00c9dbed54d0459d7862e849d24fcde8_genetics.113.158410-2.pdf [file 00c9dbed54d0459d7862e849d24fcde8_genetics.113.158410-2.pdf]

**Table S2 Comparison between computer simulations and diffusion approximations (E[] in bold face) for different gene frequency and allelic diversity variables.**

| <b><math>u = 0.00001</math></b> |        |               |       |              |          |              |       |                |
|---------------------------------|--------|---------------|-------|--------------|----------|--------------|-------|----------------|
| $Nm$                            | $A_S$  | $E[A_S]$      | $D_A$ | $E[D_A]$     | $A_{ST}$ | $E[A_{ST}]$  | $K_T$ | $E[K_T]$       |
| 0                               | 0.299  | <b>0.301</b>  | 1.152 | <b>1.146</b> | 0.794    | <b>0.792</b> | 12.36 | <b>68.198</b>  |
| 0.01                            | 0.512  | <b>0.547</b>  | 1.203 | <b>1.174</b> | 0.701    | <b>0.682</b> | 10.50 | <b>37.366</b>  |
| 0.05                            | 0.923  | <b>1.059</b>  | 1.028 | <b>0.969</b> | 0.527    | <b>0.478</b> | 7.31  | <b>16.269</b>  |
| 0.1                             | 1.444  | <b>1.277</b>  | 0.935 | <b>0.749</b> | 0.393    | <b>0.370</b> | 6.57  | <b>11.208</b>  |
| 0.5                             | 1.652  | <b>1.483</b>  | 0.533 | <b>0.385</b> | 0.244    | <b>0.206</b> | 5.45  | <b>6.223</b>   |
| 1                               | 1.628  | <b>1.574</b>  | 0.436 | <b>0.330</b> | 0.211    | <b>0.173</b> | 4.94  | <b>5.515</b>   |
| 5                               | 1.961  | <b>1.909</b>  | 0.365 | <b>0.280</b> | 0.157    | <b>0.128</b> | 4.75  | <b>4.928</b>   |
| 10                              | 2.218  | <b>2.080</b>  | 0.337 | <b>0.269</b> | 0.132    | <b>0.115</b> | 4.76  | <b>4.853</b>   |
| 50                              | 2.431  | <b>2.464</b>  | 0.265 | <b>0.248</b> | 0.098    | <b>0.092</b> | 4.64  | <b>4.792</b>   |
| 100                             | 2.592  | <b>2.598</b>  | 0.283 | <b>0.236</b> | 0.098    | <b>0.083</b> | 4.72  | <b>4.785</b>   |
| 500                             | 3.009  | <b>2.782</b>  | 0.233 | <b>0.180</b> | 0.072    | <b>0.061</b> | 4.87  | <b>4.779</b>   |
| 1000                            | 3.110  | <b>2.802</b>  | 0.217 | <b>0.136</b> | 0.065    | <b>0.046</b> | 4.91  | <b>4.778</b>   |
| <b><math>u = 0.0002</math></b>  |        |               |       |              |          |              |       |                |
| 0                               | 5.605  | <b>4.887</b>  | 5.945 | <b>4.382</b> | 0.515    | <b>0.473</b> | 66.05 | <b>112.854</b> |
| 0.01                            | 5.784  | <b>5.058</b>  | 6.049 | <b>4.435</b> | 0.511    | <b>0.467</b> | 65.16 | <b>110.190</b> |
| 0.05                            | 6.370  | <b>5.782</b>  | 6.402 | <b>4.683</b> | 0.501    | <b>0.448</b> | 64.84 | <b>101.763</b> |
| 0.1                             | 7.323  | <b>6.552</b>  | 6.854 | <b>4.872</b> | 0.483    | <b>0.427</b> | 63.67 | <b>94.500</b>  |
| 0.5                             | 11.942 | <b>10.520</b> | 7.653 | <b>5.352</b> | 0.391    | <b>0.337</b> | 61.33 | <b>74.240</b>  |
| 1                               | 15.569 | <b>13.205</b> | 7.768 | <b>5.389</b> | 0.333    | <b>0.290</b> | 61.87 | <b>68.030</b>  |
| 5                               | 23.456 | <b>20.803</b> | 7.196 | <b>5.249</b> | 0.235    | <b>0.202</b> | 61.55 | <b>61.392</b>  |
| 10                              | 26.924 | <b>24.416</b> | 6.750 | <b>5.222</b> | 0.200    | <b>0.176</b> | 60.98 | <b>60.419</b>  |
| 50                              | 33.847 | <b>32.129</b> | 5.857 | <b>4.880</b> | 0.147    | <b>0.132</b> | 60.08 | <b>59.614</b>  |
| 100                             | 36.821 | <b>34.941</b> | 5.323 | <b>4.777</b> | 0.126    | <b>0.120</b> | 58.88 | <b>59.511</b>  |
| 500                             | 40.904 | <b>38.592</b> | 4.822 | <b>3.610</b> | 0.105    | <b>0.086</b> | 58.87 | <b>59.429</b>  |
| 1000                            | 43.009 | <b>38.968</b> | 4.649 | <b>2.707</b> | 0.098    | <b>0.065</b> | 59.92 | <b>59.419</b>  |

The scenario considered refers to a subdivided population with  $n = 10$  subpopulations, each of size  $N = 1000$  individuals, mutation rate  $u$ , variable migration rate ( $m$ ), and no sampling (all subpopulation individuals are analysed). See main text for definitions.
