# Supplementary material
Source: PubMed Central journal article supplement (PMC3832279)
Supplement: 241b8de7c6398219af487fb2f764da05_genetics.113.158410-4.pdf [file 241b8de7c6398219af487fb2f764da05_genetics.113.158410-4.pdf]

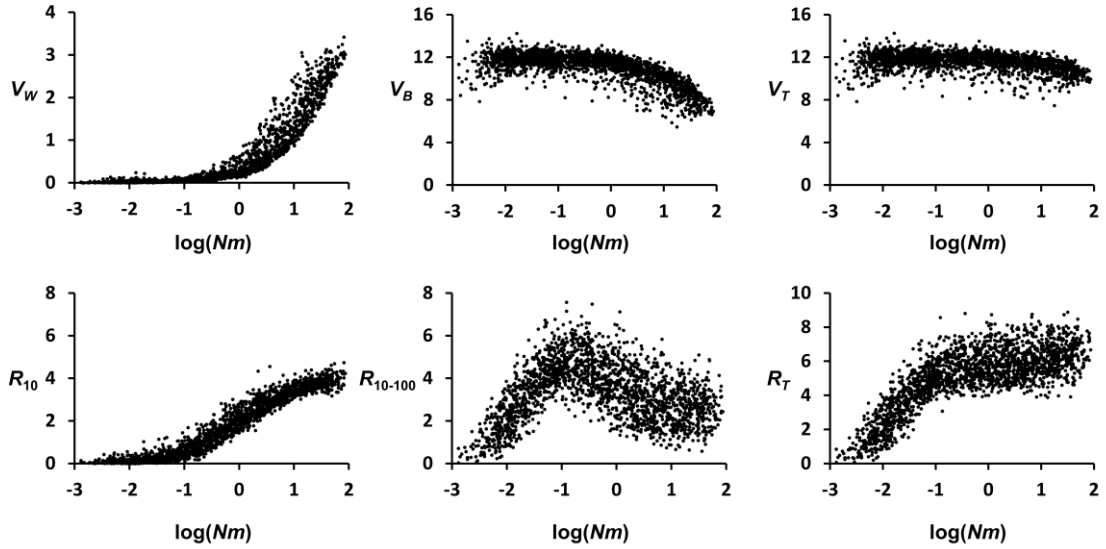

**Figure S2** Initial quantitative trait variance components and responses to selection for the simulations plotted against the number of migrants per generation and subpopulation ( $Nm$ , in  $\log_{10}$ ). The scenario refers to a subdivided population with  $n = 10$  subpopulations, number of migrants per generation and subpopulation ( $Nm$ ) either  $< 0.5$  or  $> 0.5$ , mutation rate  $u = 0.00001$  and strength of stabilising selection  $\omega^2 = 25$ . Results are based on 2,000 simulations varying the subpopulation size ( $N$ ) randomly between 100 and 1000, and the migration rate ( $m$ ) between 0.0001 and 0.1.  $V_W$ : Within-subpopulation genetic variance;  $V_B$ : Between-subpopulation genetic variance;  $V_T$ : Total genetic variance;  $R_{10}$ : response to selection until generation 10;  $R_{10-100}$ : response from generations 10 to 100;  $R_T$ : total response until generation 100.

The figure shows that whereas the short-term response ( $R_{10}$ ) increases monotonically with  $Nm$ , the late response ( $R_{10-100}$ ) increases with  $Nm$  for  $\log(Nm) \approx -0.3$  ( $Nm < \sim 0.5$ ), and decreases thereafter. This indicates that, when subpopulations are considerably isolated from one another ( $Nm < \sim 0.5$ , corresponding to an expected  $F_{ST} > \sim 1/3$ ),  $V_W$  is very low and  $V_B$  rather high, and late and total response increase with  $Nm$ , due to the slow but continuous increase of  $V_W$  at the expense of  $V_B$ . For higher levels of migration ( $Nm > \sim 0.5$ ; corresponding to  $F_{ST} < \sim 1/3$ ),  $V_W$  increases substantially with migration, implying an increase in the short-term response, but  $V_B$  and  $V_T$  decline consistently, implying a decline in late response.
