# Supplementary material
Source: PubMed Central journal article supplement (PMC3832279)
Supplement: b5af63bc60c1ba92f450cac4066d7144_genetics.113.158410-3.pdf [file b5af63bc60c1ba92f450cac4066d7144_genetics.113.158410-3.pdf]

**Table S1 Ordinary correlation coefficients between initial population genetic diversity variables and response to selection for a structured population**

|                |                                   | <i>Nm</i> < 0.5        |                            |                       | <i>Nm</i> > 0.5        |                            |                       |
|----------------|-----------------------------------|------------------------|----------------------------|-----------------------|------------------------|----------------------------|-----------------------|
|                |                                   | <i>R</i> <sub>10</sub> | <i>R</i> <sub>10-100</sub> | <i>R</i> <sub>T</sub> | <i>R</i> <sub>10</sub> | <i>R</i> <sub>10-100</sub> | <i>R</i> <sub>T</sub> |
| <b>QT</b>      | <i>V<sub>W</sub></i>              | 0.786                  | 0.269                      | 0.450                 | 0.839                  | -0.515                     | 0.084                 |
|                | <i>V<sub>B</sub></i>              | -0.011                 | 0.270                      | 0.228                 | -0.715                 | 0.543                      | 0.052                 |
|                | <i>V<sub>T</sub></i>              | 0.050                  | 0.293                      | 0.264                 | -0.455                 | 0.468                      | 0.178                 |
|                | <i>Q<sub>ST</sub></i>             | -0.774                 | -0.251                     | -0.431                | -0.833                 | 0.536                      | -0.055                |
| <b>QTL</b>     | <i>H<sub>S</sub><sup>*</sup></i>  | 0.738                  | 0.487                      | 0.623                 | 0.726                  | -0.387                     | 0.143                 |
|                | <i>D<sub>G</sub><sup>*</sup></i>  | -0.678                 | -0.417                     | -0.547                | -0.930                 | 0.581                      | -0.082                |
|                | <i>H<sub>T</sub><sup>*</sup></i>  | -0.458                 | -0.268                     | -0.357                | 0.009                  | 0.082                      | 0.105                 |
|                | <i>G<sub>ST</sub><sup>*</sup></i> | -0.830                 | -0.500                     | -0.659                | -0.904                 | 0.544                      | -0.104                |
|                | <i>A<sub>S</sub><sup>*</sup></i>  | 0.690                  | 0.634                      | 0.734                 | 0.414                  | 0.033                      | 0.382                 |
|                | <i>D<sub>A</sub><sup>*</sup></i>  | -0.433                 | 0.079                      | -0.054                | -0.519                 | 0.615                      | 0.299                 |
|                | <i>A<sub>T</sub><sup>*</sup></i>  | 0.443                  | 0.598                      | 0.635                 | 0.249                  | 0.175                      | 0.414                 |
|                | <i>K<sub>T</sub><sup>*</sup></i>  | -0.385                 | 0.009                      | -0.100                | -0.097                 | 0.428                      | 0.427                 |
|                | <i>A<sub>ST</sub><sup>*</sup></i> | -0.805                 | -0.672                     | -0.800                | -0.749                 | 0.613                      | 0.107                 |
|                | <i>D<sup>*</sup></i>              | -0.621                 | -0.369                     | -0.490                | -0.889                 | 0.561                      | -0.072                |
| <b>Markers</b> | <i>H<sub>S</sub></i>              | 0.660                  | 0.690                      | 0.774                 | 0.248                  | 0.165                      | 0.401                 |
|                | <i>D<sub>G</sub></i>              | -0.779                 | -0.550                     | -0.689                | -0.882                 | 0.562                      | -0.065                |
|                | <i>H<sub>T</sub></i>              | -0.483                 | -0.116                     | -0.234                | -0.225                 | 0.454                      | 0.353                 |
|                | <i>G<sub>ST</sub></i>             | -0.782                 | -0.650                     | -0.774                | -0.875                 | 0.473                      | -0.165                |
|                | <i>A<sub>S</sub></i>              | 0.531                  | 0.694                      | 0.742                 | 0.385                  | 0.090                      | 0.426                 |
|                | <i>D<sub>A</sub></i>              | -0.091                 | 0.425                      | 0.337                 | -0.368                 | 0.561                      | 0.360                 |
|                | <i>A<sub>T</sub></i>              | 0.344                  | 0.646                      | 0.648                 | 0.248                  | 0.198                      | 0.441                 |
|                | <i>K<sub>T</sub></i>              | -0.137                 | 0.373                      | 0.280                 | -0.150                 | 0.458                      | 0.419                 |
|                | <i>A<sub>ST</sub></i>             | -0.748                 | -0.710                     | -0.816                | -0.895                 | 0.601                      | -0.029                |
|                | <i>D</i>                          | -0.774                 | -0.521                     | -0.662                | -0.881                 | 0.568                      | -0.057                |

The scenario refers to a subdivided population with  $n = 10$  subpopulations,  $Nm$  migrants per generation and subpopulation, mutation rate  $u = 0.00001$  and strength of stabilising selection given by  $\omega^2 = 25$ . The variables included in the model are for quantitative trait (QT) and QTLs:  $V_W, V_B, V_T, Q_{ST}, H_S^*, D_G^*, H_T^*, G_{ST}^*, A_S^*, D_A^*, A_T^*, A_{ST}^*, D^*$  and  $K_T^*$ ; and for neutral markers:  $H_S, D_G, H_T, G_{ST}, A_S, D_A, A_T, A_{ST}, D$  and  $K_T$  (see main text for definitions).  $R_{10}$ : response to selection until generation 10;  $R_{10-100}$ : response from generations 10 to 100;  $R_T$ : total response until generation 100. Average values (and its standard deviation) of  $K_T^*$  across runs was 3.6 (0.9) and that of  $K_T$  was 3.0 (0.8). The results are based on 5 sets of 2000 simulation runs varying the subpopulation size ( $N$ ) randomly between 100 and 1000, and the migration rate ( $m$ ) between 0.0001 and 0.1.
