# Supplementary material
Source: PubMed Central journal article supplement (PMC3832279)
Supplement: c9831cb1164edd35d05d68b0c09ad963_genetics.113.158410-6.pdf [file c9831cb1164edd35d05d68b0c09ad963_genetics.113.158410-6.pdf]

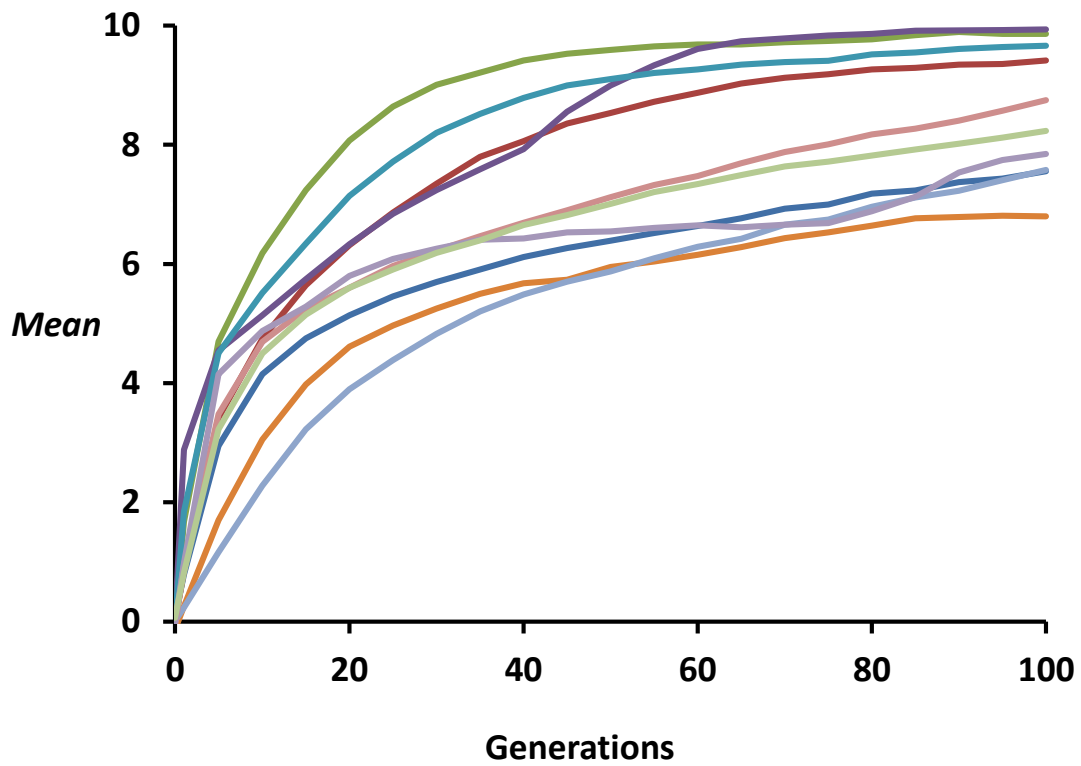

**Figure S1** Example of simulated selection responses (change in the phenotypic mean for the selected quantitative trait) occurred after a change in the selection optimum in the population. The scenario refers to a subdivided population with  $n = 10$  subpopulations, with a subpopulation census size randomly taken between 100 and 1000 and a migration rate among subpopulations randomly taken between 0.0001 and 0.1.
