# Supplementary material
Source: PubMed Central journal article supplement (PMC3832279)
Supplement: da5e4d37fa8f59a1740c782f9f9f2869_genetics.113.158410-5.pdf [file da5e4d37fa8f59a1740c782f9f9f2869_genetics.113.158410-5.pdf]

**Table S3 Comparison between computer simulations and diffusion approximations (E[] in bold face) for different allelic diversity variables.**

| <b><math>u = 0.00001</math></b> |     |        |                            |       |                            |          |                               |        |                            |
|---------------------------------|-----|--------|----------------------------|-------|----------------------------|----------|-------------------------------|--------|----------------------------|
| $Nm$                            | $g$ | $A_S$  | <b>E[<math>A_S</math>]</b> | $D_A$ | <b>E[<math>D_A</math>]</b> | $A_{ST}$ | <b>E[<math>A_{ST}</math>]</b> | $K_T$  | <b>E[<math>K_T</math>]</b> |
| 0                               | 100 | 0.188  | <b>0.207</b>               | 1.052 | <b>1.072</b>               | 0.848    | <b>0.838</b>                  | 11.250 | <b>44.151</b>              |
|                                 | 50  | 0.182  | <b>0.170</b>               | 1.047 | <b>1.041</b>               | 0.852    | <b>0.860</b>                  | 11.224 | <b>37.873</b>              |
|                                 | 20  | 0.144  | <b>0.129</b>               | 1.012 | <b>1.007</b>               | 0.876    | <b>0.887</b>                  | 10.838 | <b>29.597</b>              |
|                                 | 10  | 0.119  | <b>0.103</b>               | 0.990 | <b>0.986</b>               | 0.893    | <b>0.906</b>                  | 10.596 | <b>23.505</b>              |
| 1                               | 100 | 1.293  | <b>1.290</b>               | 0.368 | <b>0.337</b>               | 0.221    | <b>0.207</b>                  | 3.950  | <b>4.282</b>               |
|                                 | 50  | 1.192  | <b>1.168</b>               | 0.367 | <b>0.345</b>               | 0.236    | <b>0.228</b>                  | 3.806  | <b>4.012</b>               |
|                                 | 20  | 0.980  | <b>0.982</b>               | 0.350 | <b>0.346</b>               | 0.264    | <b>0.260</b>                  | 3.460  | <b>3.568</b>               |
|                                 | 10  | 0.792  | <b>0.806</b>               | 0.339 | <b>0.347</b>               | 0.301    | <b>0.301</b>                  | 3.196  | <b>3.231</b>               |
| 1000                            | 100 | 1.968  | <b>1.839</b>               | 0.250 | <b>0.277</b>               | 0.113    | <b>0.131</b>                  | 3.870  | <b>3.751</b>               |
|                                 | 50  | 1.565  | <b>1.569</b>               | 0.248 | <b>0.277</b>               | 0.137    | <b>0.150</b>                  | 3.474  | <b>3.487</b>               |
|                                 | 20  | 1.189  | <b>1.202</b>               | 0.249 | <b>0.277</b>               | 0.173    | <b>0.187</b>                  | 3.084  | <b>3.124</b>               |
|                                 | 10  | 0.898  | <b>0.923</b>               | 0.248 | <b>0.278</b>               | 0.217    | <b>0.231</b>                  | 2.818  | <b>2.848</b>               |
| <b><math>u = 0.0002</math></b>  |     |        |                            |       |                            |          |                               |        |                            |
| 0                               | 100 | 3.439  | <b>3.274</b>               | 3.995 | <b>3.431</b>               | 0.537    | <b>0.512</b>                  | 44.390 | <b>69.487</b>              |
|                                 | 50  | 2.900  | <b>2.738</b>               | 3.510 | <b>3.060</b>               | 0.548    | <b>0.528</b>                  | 39.004 | <b>58.257</b>              |
|                                 | 20  | 2.174  | <b>2.085</b>               | 2.857 | <b>2.609</b>               | 0.568    | <b>0.556</b>                  | 31.742 | <b>43.646</b>              |
|                                 | 10  | 1.629  | <b>1.639</b>               | 2.366 | <b>2.295</b>               | 0.592    | <b>0.583</b>                  | 26.290 | <b>33.168</b>              |
| 1                               | 100 | 9.441  | <b>9.106</b>               | 5.608 | <b>4.803</b>               | 0.373    | <b>0.345</b>                  | 41.140 | <b>44.052</b>              |
|                                 | 50  | 7.877  | <b>7.366</b>               | 4.894 | <b>4.392</b>               | 0.383    | <b>0.374</b>                  | 35.330 | <b>38.171</b>              |
|                                 | 20  | 5.580  | <b>5.392</b>               | 3.955 | <b>3.818</b>               | 0.415    | <b>0.415</b>                  | 28.250 | <b>29.810</b>              |
|                                 | 10  | 3.865  | <b>3.786</b>               | 3.173 | <b>3.180</b>               | 0.451    | <b>0.457</b>                  | 22.940 | <b>23.658</b>              |
| 1000                            | 100 | 20.181 | <b>20.206</b>              | 4.847 | <b>5.236</b>               | 0.194    | <b>0.206</b>                  | 39.390 | <b>28.938</b>              |
|                                 | 50  | 15.401 | <b>15.320</b>              | 4.529 | <b>5.044</b>               | 0.227    | <b>0.248</b>                  | 33.694 | <b>33.583</b>              |
|                                 | 20  | 9.451  | <b>9.350</b>               | 3.957 | <b>4.358</b>               | 0.295    | <b>0.318</b>                  | 26.608 | <b>26.507</b>              |
|                                 | 10  | 5.802  | <b>5.758</b>               | 3.283 | <b>3.600</b>               | 0.361    | <b>0.385</b>                  | 21.428 | <b>21.271</b>              |

The scenario considered refers to a subdivided population with  $n = 10$  subpopulations, each of size  $N = 1000$  individuals, mutation rate  $u$ , variable migration rate ( $m$ ), and  $g$  sampled genes per subpopulation. See main text for definitions.
