# Supplementary material
Source: PubMed Central journal article supplement (PMC3832279)
Supplement: f3b7249e4660abb7f3b11b60f7aaa479_genetics.113.158410-1.pdf [file f3b7249e4660abb7f3b11b60f7aaa479_genetics.113.158410-1.pdf]

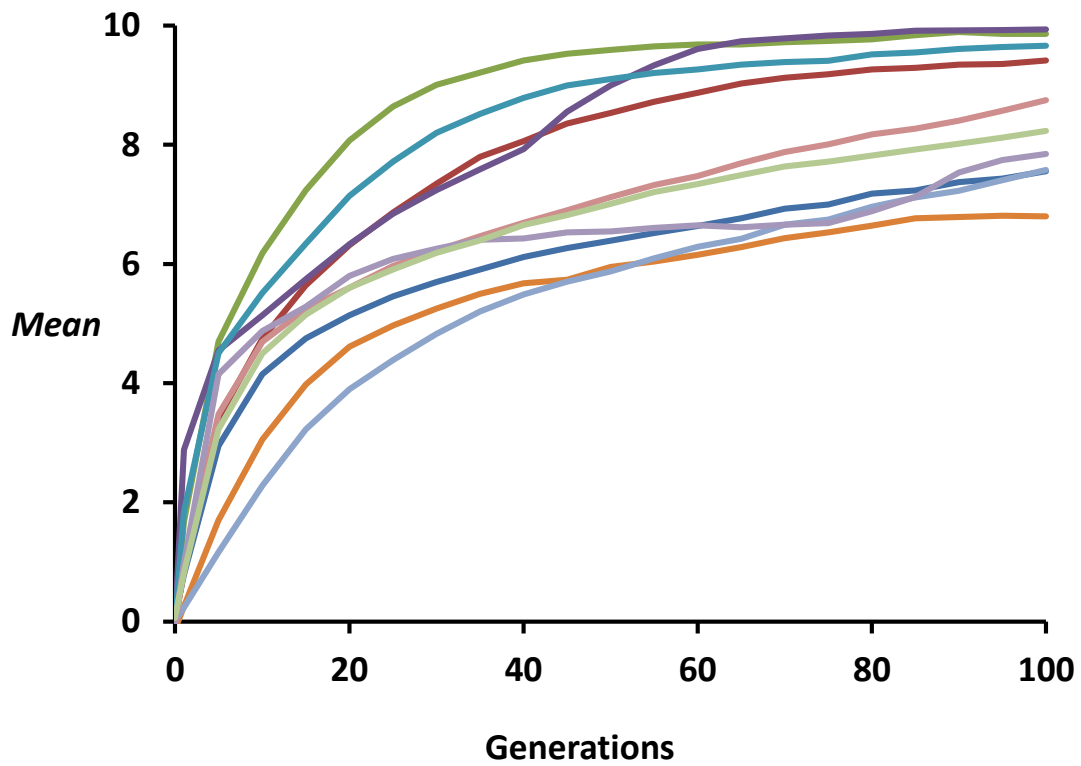

**Figure S1** Example of simulated selection responses (change in the phenotypic mean for the selected quantitative trait) occurred after a change in the selection optimum in the population. The scenario refers to a subdivided population with  $n = 10$  subpopulations, with a subpopulation census size randomly taken between 100 and 1000 and a migration rate among subpopulations randomly taken between 0.0001 and 0.1.

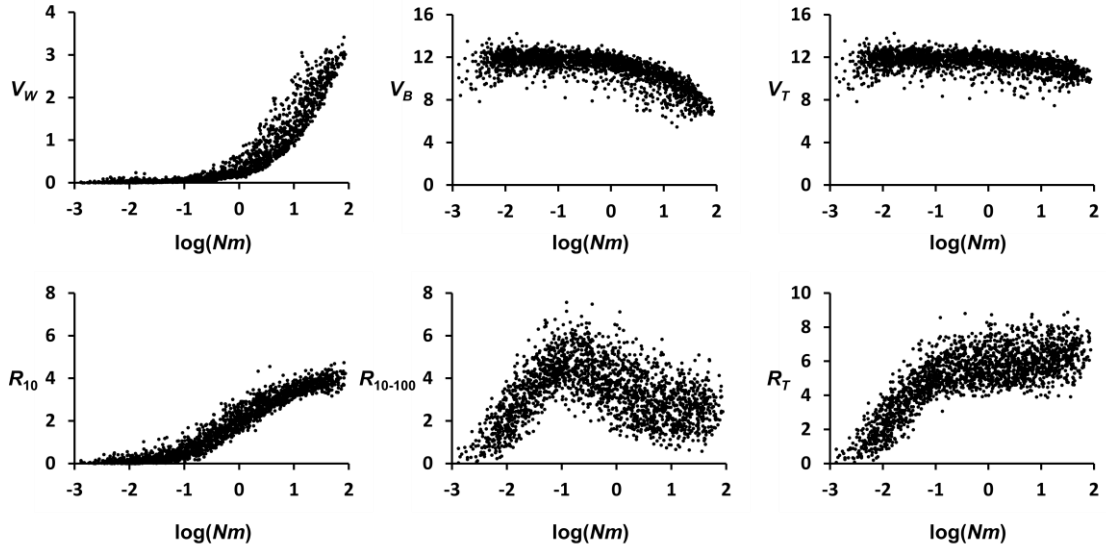

**Figure S2** Initial quantitative trait variance components and responses to selection for the simulations plotted against the number of migrants per generation and subpopulation ( $Nm$ , in  $\log_{10}$ ). The scenario refers to a subdivided population with  $n = 10$  subpopulations, number of migrants per generation and subpopulation ( $Nm$ ) either  $< 0.5$  or  $> 0.5$ , mutation rate  $u = 0.00001$  and strength of stabilising selection  $\omega^2 = 25$ . Results are based on 2,000 simulations varying the subpopulation size ( $N$ ) randomly between 100 and 1000, and the migration rate ( $m$ ) between 0.0001 and 0.1.  $V_W$ : Within-subpopulation genetic variance;  $V_B$ : Between-subpopulation genetic variance;  $V_T$ : Total genetic variance;  $R_{10}$ : response to selection until generation 10;  $R_{10-100}$ : response from generations 10 to 100;  $R_T$ : total response until generation 100.

The figure shows that whereas the short-term response ( $R_{10}$ ) increases monotonically with  $Nm$ , the late response ( $R_{10-100}$ ) increases with  $Nm$  for  $\log(Nm) \approx -0.3$  ( $Nm < \sim 0.5$ ), and decreases thereafter. This indicates that, when subpopulations are considerably isolated from one another ( $Nm < \sim 0.5$ , corresponding to an expected  $F_{ST} > \sim 1/3$ ),  $V_W$  is very low and  $V_B$  rather high, and late and total response increase with  $Nm$ , due to the slow but continuous increase of  $V_W$  at the expense of  $V_B$ . For higher levels of migration ( $Nm > \sim 0.5$ ; corresponding to  $F_{ST} < \sim 1/3$ ),  $V_W$  increases substantially with migration, implying an increase in the short-term response, but  $V_B$  and  $V_T$  decline consistently, implying a decline in late response.

**Table S1 Ordinary correlation coefficients between initial population genetic diversity variables and response to selection for a structured population**

|                |                                   | <i>Nm</i> < 0.5        |                            |                       | <i>Nm</i> > 0.5        |                            |                       |
|----------------|-----------------------------------|------------------------|----------------------------|-----------------------|------------------------|----------------------------|-----------------------|
|                |                                   | <i>R</i> <sub>10</sub> | <i>R</i> <sub>10-100</sub> | <i>R</i> <sub>T</sub> | <i>R</i> <sub>10</sub> | <i>R</i> <sub>10-100</sub> | <i>R</i> <sub>T</sub> |
| <b>QT</b>      | <i>V<sub>W</sub></i>              | 0.786                  | 0.269                      | 0.450                 | 0.839                  | -0.515                     | 0.084                 |
|                | <i>V<sub>B</sub></i>              | -0.011                 | 0.270                      | 0.228                 | -0.715                 | 0.543                      | 0.052                 |
|                | <i>V<sub>T</sub></i>              | 0.050                  | 0.293                      | 0.264                 | -0.455                 | 0.468                      | 0.178                 |
|                | <i>Q<sub>ST</sub></i>             | -0.774                 | -0.251                     | -0.431                | -0.833                 | 0.536                      | -0.055                |
| <b>QTL</b>     | <i>H<sub>S</sub><sup>*</sup></i>  | 0.738                  | 0.487                      | 0.623                 | 0.726                  | -0.387                     | 0.143                 |
|                | <i>D<sub>G</sub><sup>*</sup></i>  | -0.678                 | -0.417                     | -0.547                | -0.930                 | 0.581                      | -0.082                |
|                | <i>H<sub>T</sub><sup>*</sup></i>  | -0.458                 | -0.268                     | -0.357                | 0.009                  | 0.082                      | 0.105                 |
|                | <i>G<sub>ST</sub><sup>*</sup></i> | -0.830                 | -0.500                     | -0.659                | -0.904                 | 0.544                      | -0.104                |
|                | <i>A<sub>S</sub><sup>*</sup></i>  | 0.690                  | 0.634                      | 0.734                 | 0.414                  | 0.033                      | 0.382                 |
|                | <i>D<sub>A</sub><sup>*</sup></i>  | -0.433                 | 0.079                      | -0.054                | -0.519                 | 0.615                      | 0.299                 |
|                | <i>A<sub>T</sub><sup>*</sup></i>  | 0.443                  | 0.598                      | 0.635                 | 0.249                  | 0.175                      | 0.414                 |
|                | <i>K<sub>T</sub><sup>*</sup></i>  | -0.385                 | 0.009                      | -0.100                | -0.097                 | 0.428                      | 0.427                 |
|                | <i>A<sub>ST</sub><sup>*</sup></i> | -0.805                 | -0.672                     | -0.800                | -0.749                 | 0.613                      | 0.107                 |
|                | <i>D<sup>*</sup></i>              | -0.621                 | -0.369                     | -0.490                | -0.889                 | 0.561                      | -0.072                |
| <b>Markers</b> | <i>H<sub>S</sub></i>              | 0.660                  | 0.690                      | 0.774                 | 0.248                  | 0.165                      | 0.401                 |
|                | <i>D<sub>G</sub></i>              | -0.779                 | -0.550                     | -0.689                | -0.882                 | 0.562                      | -0.065                |
|                | <i>H<sub>T</sub></i>              | -0.483                 | -0.116                     | -0.234                | -0.225                 | 0.454                      | 0.353                 |
|                | <i>G<sub>ST</sub></i>             | -0.782                 | -0.650                     | -0.774                | -0.875                 | 0.473                      | -0.165                |
|                | <i>A<sub>S</sub></i>              | 0.531                  | 0.694                      | 0.742                 | 0.385                  | 0.090                      | 0.426                 |
|                | <i>D<sub>A</sub></i>              | -0.091                 | 0.425                      | 0.337                 | -0.368                 | 0.561                      | 0.360                 |
|                | <i>A<sub>T</sub></i>              | 0.344                  | 0.646                      | 0.648                 | 0.248                  | 0.198                      | 0.441                 |
|                | <i>K<sub>T</sub></i>              | -0.137                 | 0.373                      | 0.280                 | -0.150                 | 0.458                      | 0.419                 |
|                | <i>A<sub>ST</sub></i>             | -0.748                 | -0.710                     | -0.816                | -0.895                 | 0.601                      | -0.029                |
|                | <i>D</i>                          | -0.774                 | -0.521                     | -0.662                | -0.881                 | 0.568                      | -0.057                |

The scenario refers to a subdivided population with  $n = 10$  subpopulations,  $Nm$  migrants per generation and subpopulation, mutation rate  $u = 0.00001$  and strength of stabilising selection given by  $\omega^2 = 25$ . The variables included in the model are for quantitative trait (QT) and QTLs:  $V_W, V_B, V_T, Q_{ST}, H_S^*, D_G^*, H_T^*, G_{ST}^*, A_S^*, D_A^*, A_T^*, A_{ST}^*, D^*$  and  $K_T^*$ ; and for neutral markers:  $H_S, D_G, H_T, G_{ST}, A_S, D_A, A_T, A_{ST}, D$  and  $K_T$  (see main text for definitions).  $R_{10}$ : response to selection until generation 10;  $R_{10-100}$ : response from generations 10 to 100;  $R_T$ : total response until generation 100. Average values (and its standard deviation) of  $K_T^*$  across runs was 3.6 (0.9) and that of  $K_T$  was 3.0 (0.8). The results are based on 5 sets of 2000 simulation runs varying the subpopulation size ( $N$ ) randomly between 100 and 1000, and the migration rate ( $m$ ) between 0.0001 and 0.1.

**Table S2 Comparison between computer simulations and diffusion approximations (E[] in bold face) for different gene frequency and allelic diversity variables.**

| <b><math>u = 0.00001</math></b> |        |               |       |              |          |              |       |                |
|---------------------------------|--------|---------------|-------|--------------|----------|--------------|-------|----------------|
| $Nm$                            | $A_S$  | $E[A_S]$      | $D_A$ | $E[D_A]$     | $A_{ST}$ | $E[A_{ST}]$  | $K_T$ | $E[K_T]$       |
| 0                               | 0.299  | <b>0.301</b>  | 1.152 | <b>1.146</b> | 0.794    | <b>0.792</b> | 12.36 | <b>68.198</b>  |
| 0.01                            | 0.512  | <b>0.547</b>  | 1.203 | <b>1.174</b> | 0.701    | <b>0.682</b> | 10.50 | <b>37.366</b>  |
| 0.05                            | 0.923  | <b>1.059</b>  | 1.028 | <b>0.969</b> | 0.527    | <b>0.478</b> | 7.31  | <b>16.269</b>  |
| 0.1                             | 1.444  | <b>1.277</b>  | 0.935 | <b>0.749</b> | 0.393    | <b>0.370</b> | 6.57  | <b>11.208</b>  |
| 0.5                             | 1.652  | <b>1.483</b>  | 0.533 | <b>0.385</b> | 0.244    | <b>0.206</b> | 5.45  | <b>6.223</b>   |
| 1                               | 1.628  | <b>1.574</b>  | 0.436 | <b>0.330</b> | 0.211    | <b>0.173</b> | 4.94  | <b>5.515</b>   |
| 5                               | 1.961  | <b>1.909</b>  | 0.365 | <b>0.280</b> | 0.157    | <b>0.128</b> | 4.75  | <b>4.928</b>   |
| 10                              | 2.218  | <b>2.080</b>  | 0.337 | <b>0.269</b> | 0.132    | <b>0.115</b> | 4.76  | <b>4.853</b>   |
| 50                              | 2.431  | <b>2.464</b>  | 0.265 | <b>0.248</b> | 0.098    | <b>0.092</b> | 4.64  | <b>4.792</b>   |
| 100                             | 2.592  | <b>2.598</b>  | 0.283 | <b>0.236</b> | 0.098    | <b>0.083</b> | 4.72  | <b>4.785</b>   |
| 500                             | 3.009  | <b>2.782</b>  | 0.233 | <b>0.180</b> | 0.072    | <b>0.061</b> | 4.87  | <b>4.779</b>   |
| 1000                            | 3.110  | <b>2.802</b>  | 0.217 | <b>0.136</b> | 0.065    | <b>0.046</b> | 4.91  | <b>4.778</b>   |
| <b><math>u = 0.0002</math></b>  |        |               |       |              |          |              |       |                |
| 0                               | 5.605  | <b>4.887</b>  | 5.945 | <b>4.382</b> | 0.515    | <b>0.473</b> | 66.05 | <b>112.854</b> |
| 0.01                            | 5.784  | <b>5.058</b>  | 6.049 | <b>4.435</b> | 0.511    | <b>0.467</b> | 65.16 | <b>110.190</b> |
| 0.05                            | 6.370  | <b>5.782</b>  | 6.402 | <b>4.683</b> | 0.501    | <b>0.448</b> | 64.84 | <b>101.763</b> |
| 0.1                             | 7.323  | <b>6.552</b>  | 6.854 | <b>4.872</b> | 0.483    | <b>0.427</b> | 63.67 | <b>94.500</b>  |
| 0.5                             | 11.942 | <b>10.520</b> | 7.653 | <b>5.352</b> | 0.391    | <b>0.337</b> | 61.33 | <b>74.240</b>  |
| 1                               | 15.569 | <b>13.205</b> | 7.768 | <b>5.389</b> | 0.333    | <b>0.290</b> | 61.87 | <b>68.030</b>  |
| 5                               | 23.456 | <b>20.803</b> | 7.196 | <b>5.249</b> | 0.235    | <b>0.202</b> | 61.55 | <b>61.392</b>  |
| 10                              | 26.924 | <b>24.416</b> | 6.750 | <b>5.222</b> | 0.200    | <b>0.176</b> | 60.98 | <b>60.419</b>  |
| 50                              | 33.847 | <b>32.129</b> | 5.857 | <b>4.880</b> | 0.147    | <b>0.132</b> | 60.08 | <b>59.614</b>  |
| 100                             | 36.821 | <b>34.941</b> | 5.323 | <b>4.777</b> | 0.126    | <b>0.120</b> | 58.88 | <b>59.511</b>  |
| 500                             | 40.904 | <b>38.592</b> | 4.822 | <b>3.610</b> | 0.105    | <b>0.086</b> | 58.87 | <b>59.429</b>  |
| 1000                            | 43.009 | <b>38.968</b> | 4.649 | <b>2.707</b> | 0.098    | <b>0.065</b> | 59.92 | <b>59.419</b>  |

The scenario considered refers to a subdivided population with  $n = 10$  subpopulations, each of size  $N = 1000$  individuals, mutation rate  $u$ , variable migration rate ( $m$ ), and no sampling (all subpopulation individuals are analysed). See main text for definitions.

**Table S3 Comparison between computer simulations and diffusion approximations (E[] in bold face) for different allelic diversity variables.**

| <b><math>u = 0.00001</math></b> |     |        |                            |       |                            |          |                               |        |                            |
|---------------------------------|-----|--------|----------------------------|-------|----------------------------|----------|-------------------------------|--------|----------------------------|
| $Nm$                            | $g$ | $A_S$  | <b>E[<math>A_S</math>]</b> | $D_A$ | <b>E[<math>D_A</math>]</b> | $A_{ST}$ | <b>E[<math>A_{ST}</math>]</b> | $K_T$  | <b>E[<math>K_T</math>]</b> |
| 0                               | 100 | 0.188  | <b>0.207</b>               | 1.052 | <b>1.072</b>               | 0.848    | <b>0.838</b>                  | 11.250 | <b>44.151</b>              |
|                                 | 50  | 0.182  | <b>0.170</b>               | 1.047 | <b>1.041</b>               | 0.852    | <b>0.860</b>                  | 11.224 | <b>37.873</b>              |
|                                 | 20  | 0.144  | <b>0.129</b>               | 1.012 | <b>1.007</b>               | 0.876    | <b>0.887</b>                  | 10.838 | <b>29.597</b>              |
|                                 | 10  | 0.119  | <b>0.103</b>               | 0.990 | <b>0.986</b>               | 0.893    | <b>0.906</b>                  | 10.596 | <b>23.505</b>              |
| 1                               | 100 | 1.293  | <b>1.290</b>               | 0.368 | <b>0.337</b>               | 0.221    | <b>0.207</b>                  | 3.950  | <b>4.282</b>               |
|                                 | 50  | 1.192  | <b>1.168</b>               | 0.367 | <b>0.345</b>               | 0.236    | <b>0.228</b>                  | 3.806  | <b>4.012</b>               |
|                                 | 20  | 0.980  | <b>0.982</b>               | 0.350 | <b>0.346</b>               | 0.264    | <b>0.260</b>                  | 3.460  | <b>3.568</b>               |
|                                 | 10  | 0.792  | <b>0.806</b>               | 0.339 | <b>0.347</b>               | 0.301    | <b>0.301</b>                  | 3.196  | <b>3.231</b>               |
| 1000                            | 100 | 1.968  | <b>1.839</b>               | 0.250 | <b>0.277</b>               | 0.113    | <b>0.131</b>                  | 3.870  | <b>3.751</b>               |
|                                 | 50  | 1.565  | <b>1.569</b>               | 0.248 | <b>0.277</b>               | 0.137    | <b>0.150</b>                  | 3.474  | <b>3.487</b>               |
|                                 | 20  | 1.189  | <b>1.202</b>               | 0.249 | <b>0.277</b>               | 0.173    | <b>0.187</b>                  | 3.084  | <b>3.124</b>               |
|                                 | 10  | 0.898  | <b>0.923</b>               | 0.248 | <b>0.278</b>               | 0.217    | <b>0.231</b>                  | 2.818  | <b>2.848</b>               |
| <b><math>u = 0.0002</math></b>  |     |        |                            |       |                            |          |                               |        |                            |
| 0                               | 100 | 3.439  | <b>3.274</b>               | 3.995 | <b>3.431</b>               | 0.537    | <b>0.512</b>                  | 44.390 | <b>69.487</b>              |
|                                 | 50  | 2.900  | <b>2.738</b>               | 3.510 | <b>3.060</b>               | 0.548    | <b>0.528</b>                  | 39.004 | <b>58.257</b>              |
|                                 | 20  | 2.174  | <b>2.085</b>               | 2.857 | <b>2.609</b>               | 0.568    | <b>0.556</b>                  | 31.742 | <b>43.646</b>              |
|                                 | 10  | 1.629  | <b>1.639</b>               | 2.366 | <b>2.295</b>               | 0.592    | <b>0.583</b>                  | 26.290 | <b>33.168</b>              |
| 1                               | 100 | 9.441  | <b>9.106</b>               | 5.608 | <b>4.803</b>               | 0.373    | <b>0.345</b>                  | 41.140 | <b>44.052</b>              |
|                                 | 50  | 7.877  | <b>7.366</b>               | 4.894 | <b>4.392</b>               | 0.383    | <b>0.374</b>                  | 35.330 | <b>38.171</b>              |
|                                 | 20  | 5.580  | <b>5.392</b>               | 3.955 | <b>3.818</b>               | 0.415    | <b>0.415</b>                  | 28.250 | <b>29.810</b>              |
|                                 | 10  | 3.865  | <b>3.786</b>               | 3.173 | <b>3.180</b>               | 0.451    | <b>0.457</b>                  | 22.940 | <b>23.658</b>              |
| 1000                            | 100 | 20.181 | <b>20.206</b>              | 4.847 | <b>5.236</b>               | 0.194    | <b>0.206</b>                  | 39.390 | <b>28.938</b>              |
|                                 | 50  | 15.401 | <b>15.320</b>              | 4.529 | <b>5.044</b>               | 0.227    | <b>0.248</b>                  | 33.694 | <b>33.583</b>              |
|                                 | 20  | 9.451  | <b>9.350</b>               | 3.957 | <b>4.358</b>               | 0.295    | <b>0.318</b>                  | 26.608 | <b>26.507</b>              |
|                                 | 10  | 5.802  | <b>5.758</b>               | 3.283 | <b>3.600</b>               | 0.361    | <b>0.385</b>                  | 21.428 | <b>21.271</b>              |

The scenario considered refers to a subdivided population with  $n = 10$  subpopulations, each of size  $N = 1000$  individuals, mutation rate  $u$ , variable migration rate ( $m$ ), and  $g$  sampled genes per subpopulation. See main text for definitions.
